# Supplementary material for: Probiotics, Anticipation Stress, and the Acute Immune Response to Night Shift
Source: PubMed Central journal article supplement (PMC7877220; doi:10.3389/fimmu.2020.599547), 2021-01-28

Supplementary Figure 1

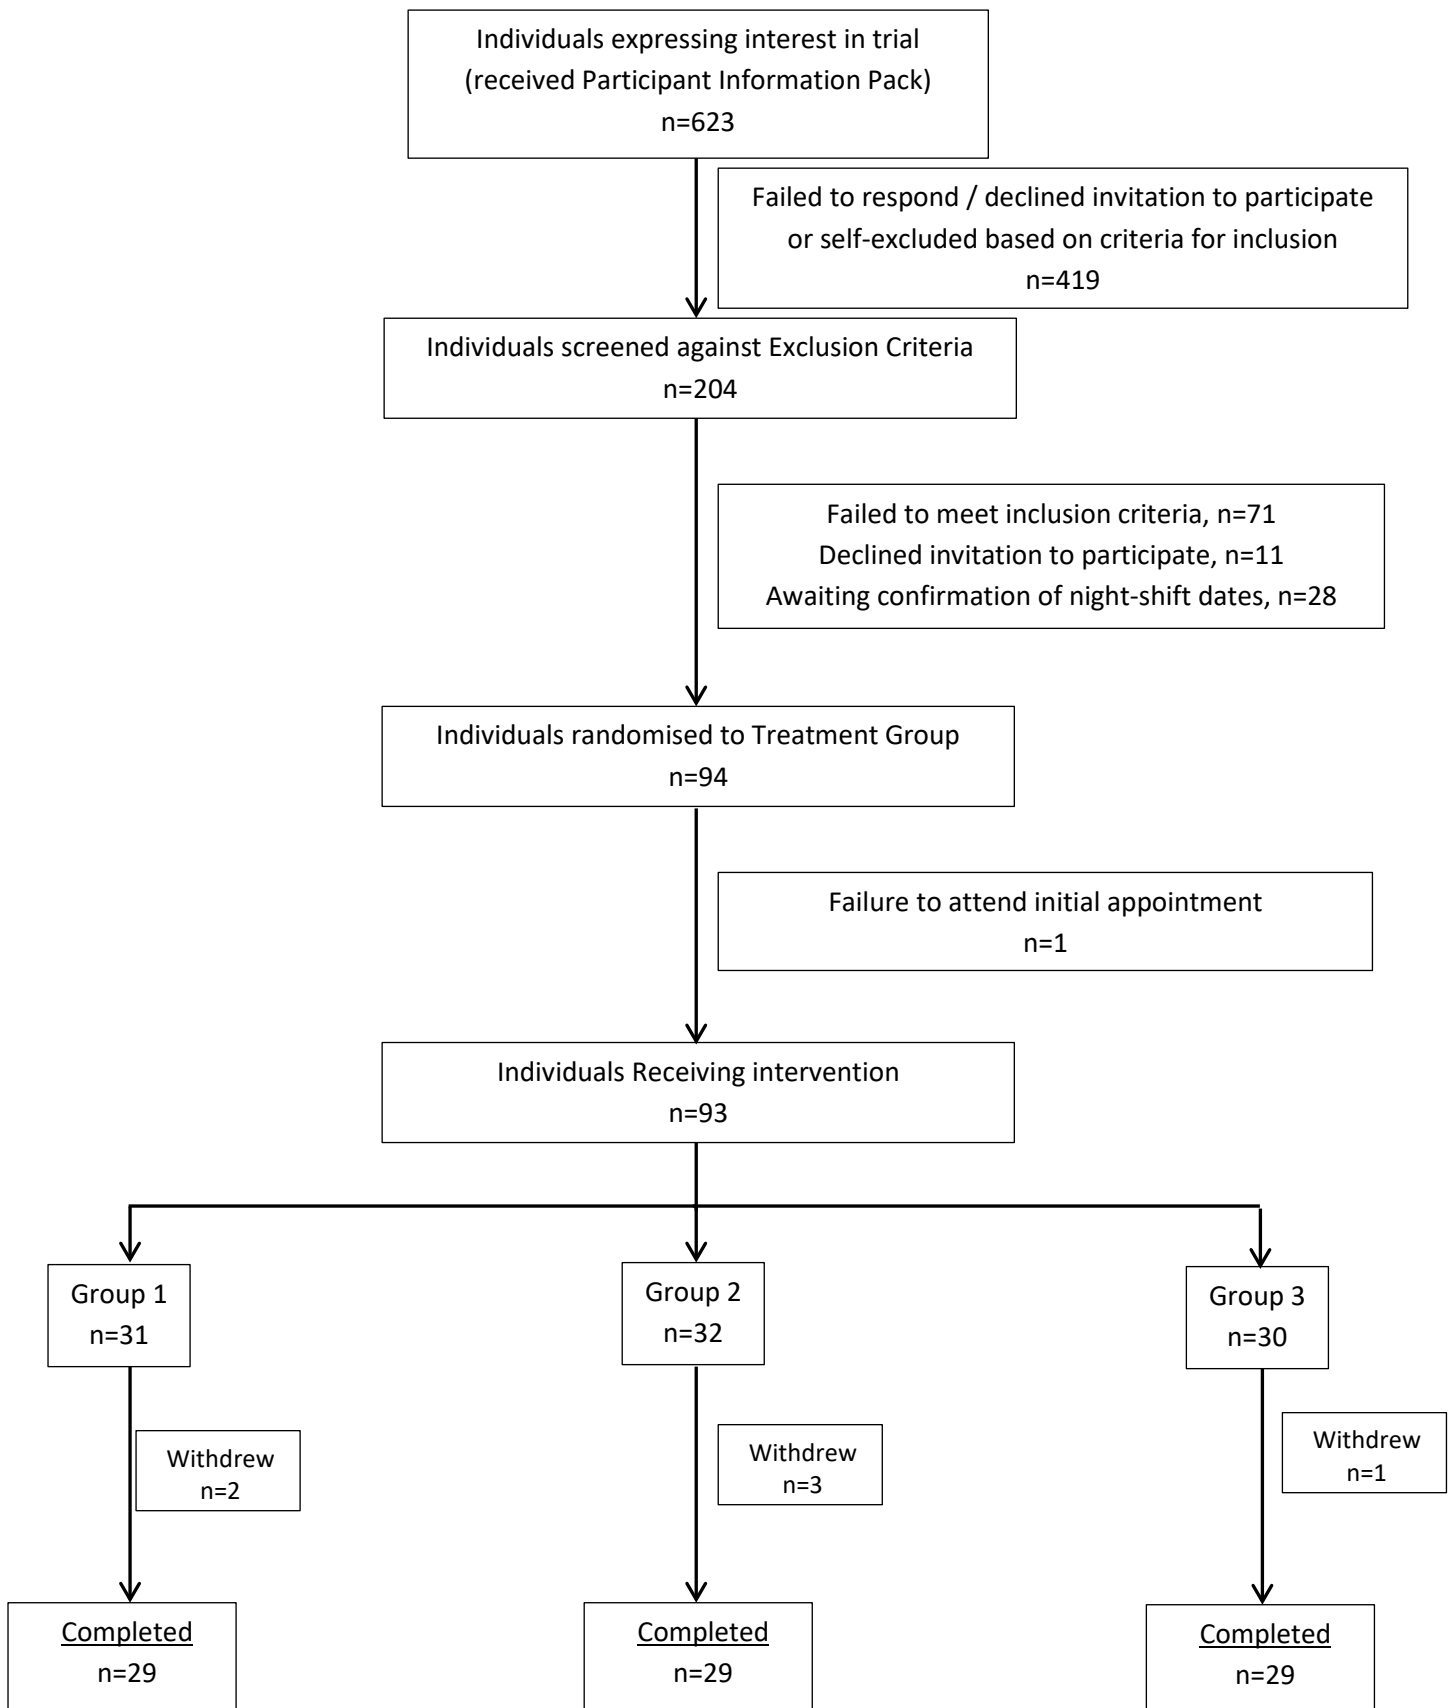

Supplement: Image_1.pdf [file Image_1.pdf]
